# Supplementary material for: Genome-wide relaxation of selection and the evolution of the island syndrome in Orkney voles
Source: HighWire-hosted journal article supplement (doi:10.1101/gr.278487.123), 2024-06-01
Supplement: Supplemental_Tables.xlsx [file Supplemental_Tables.xlsx]

## Sheet: Table S1 samples
Table S1. The samples used in this study with their sampling location and mapping depth.
Individual	Group	Latitude	Longitude	Depth
BSt095	continent	51.2232	3.07275	22.6662
BVe061	continent	51.0731	2.66803	40.7858
FBv02	continent	46.8056	6.16475	17.43
FCc02	continent	47.1844	6.82248	27.4408
FDa504	continent	49.7667	0.51666	23.8024
FFr549	continent	50.0833	1.56666	23.3396
FGr14	continent	46.6806	6.18723	37.4638
FMc03	continent	49.2544	3.93216	18.9607
FOg02	continent	47.4305	6.74298	16.8539
FPi555	continent	50.8667	1.81666	22.6176
FSt24	continent	46.3855	4.22641	29.6619
OBSO234	Orkney	58.85	-2.91659	23.3832
OBWs01	Orkney	58.8435	-2.92363	33.2564
OEOs14	Orkney	59.178	-2.75946	26.0193
OEOs15	Orkney	59.178	-2.75946	27.2119
OMBr149	Orkney	59.0824	-3.29908	22.3606
OMHo277	Orkney	58.9369	-3.06632	25.8249
ORGs21	Orkney	59.1301	-2.98977	34.3458
ORWa268	Orkney	59.1782	-3.0628	30.4954
OSaLi257	Orkney	59.2502	-2.58204	30.3179
OSaNe01	Orkney	59.2729	-2.48481	28.353
OSJC01	Orkney	58.7564	-2.93866	30.2844
OSWi166	Orkney	58.7667	-2.93333	31.5795
OWLs033	Orkney	59.2956	-2.91336	18.8349
OWPg01	Orkney	59.3232	-2.9977	28.5415
RuCh01	M. obscurus	61.3307	43.5287	16.7849
RuSu03	M. obscurus	55.5	60.56	21.9406
TuEr01	M. obscurus	40.3094	41.9474	18.238

## Sheet: Table S2 GO Western
Table S2. Significant GO term enrichments of the candidate genes experienced hard sweep in continental voles. The threshold of p value was 0.05.
source	term_name	term_id	adjusted_p_value	negative_log10_of_adjusted_p_value	term_size	query_size	intersection_size	effective_domain_size	ENSMUSG00000095700	ENSMUSG00000033615	ENSMUSG00000033623	ENSMUSG00000024805	ENSMUSG00000025050	ENSMUSG00000026739	ENSMUSG00000069678	ENSMUSG00000029491	ENSMUSG00000053965	ENSMUSG00000029490	ENSMUSG00000096433	ENSMUSG00000078502	ENSMUSG00000022204	ENSMUSG00000091131	ENSMUSG00000090690	ENSMUSG00000091725	ENSMUSG00000096685	ENSMUSG00000051900	ENSMUSG00000028125	ENSMUSG00000027550	ENSMUSG00000078905	ENSMUSG00000052387	ENSMUSG00000078632	ENSMUSG00000032348	ENSMUSG00000056260	ENSMUSG00000054746	ENSMUSG00000070448	ENSMUSG00000025004	ENSMUSG00000018800	ENSMUSG00000022194	ENSMUSG00000032251	ENSMUSG00000000197	ENSMUSG00000075703	ENSMUSG00000032261	ENSMUSG00000091407	ENSMUSG00000032051	ENSMUSG00000002617	ENSMUSG00000044501	ENSMUSG00000057409	ENSMUSG00000033972	ENSMUSG00000021640
GO:MF	sequence-specific DNA binding	GO:0043565	1.72318e-11	10.7637	1601	162	28	55414						IDA					IBA	IBA									IBA																IBA	ISO,IBA	ISO,IBA	IBA
GO:MF	transcription cis-regulatory region binding	GO:0000976	5.75785e-11	10.2397	1422	162	26	55414						IDA					IBA	IBA									IBA																IBA	IBA	IBA	IBA
GO:MF	transcription regulatory region nucleic acid binding	GO:0001067	6.13858e-11	10.2119	1426	162	26	55414						IDA					IBA	IBA									IBA																IBA	IBA	IBA	IBA
GO:MF	sequence-specific double-stranded DNA binding	GO:1990837	1.90603e-10	9.71987	1499	162	26	55414						IDA					IBA	IBA									IBA																IBA	IBA	IBA	IBA
GO:MF	RNA polymerase II transcription regulatory region sequence-specific DNA binding	GO:0000977	6.51569e-10	9.18604	1322	162	24	55414						IDA					IBA	IBA									IBA																IBA	IBA	IBA	IBA
GO:MF	double-stranded DNA binding	GO:0003690	7.58448e-10	9.12007	1594	162	26	55414						IDA					IBA	IBA									IBA																IBA	IBA	IBA	IBA
GO:MF	DNA-binding transcription factor activity	GO:0003700	8.03839e-09	8.09483	1358	162	23	55414											IBA	IBA									IBA																IBA	ISO,IBA	ISO,IBA	IBA
GO:MF	RNA polymerase II cis-regulatory region sequence-specific DNA binding	GO:0000978	8.23536e-09	8.08432	1106	162	21	55414						IDA					IBA	IBA																									IBA	IBA	IBA	IBA
GO:MF	transcription regulator activity	GO:0140110	1.07166e-08	7.96994	1797	162	26	55414											IBA	IBA									IBA																IBA	ISO,IBA	ISO,IBA	IBA
GO:MF	cis-regulatory region sequence-specific DNA binding	GO:0000987	1.20362e-08	7.91951	1129	162	21	55414						IDA					IBA	IBA																									IBA	IBA	IBA	IBA
GO:MF	DNA-binding transcription factor activity, RNA polymerase II-specific	GO:0000981	1.21745e-07	6.91455	1282	162	21	55414											IBA	IBA									IBA																IBA	ISO,IBA	ISO,IBA	IBA
GO:MF	steroid hydroxylase activity	GO:0008395	8.24387e-07	6.08387	69	162	7	55414																												ISO,IBA								ISO
GO:MF	arachidonic acid epoxygenase activity	GO:0008392	2.68652e-06	5.57081	46	162	6	55414																												IDA,ISO,IBA
GO:MF	arachidonic acid monooxygenase activity	GO:0008391	3.98181e-06	5.39992	49	162	6	55414																												IDA,ISO,IBA
GO:MF	ATP-dependent activity	GO:0140657	5.54675e-06	5.25596	547	162	13	55414																		IBA,IEA	IMP,ISS,ISO,IBA,TAS,IEA							IBA,IEA			IBA,IEA
GO:MF	monooxygenase activity	GO:0004497	1.45135e-05	4.83823	159	162	8	55414																												IDA,ISO,IBA,IEA								ISO
GO:MF	DNA-binding transcription activator activity	GO:0001216	2.32952e-05	4.63273	510	162	12	55414												IBA																									IBA	ISO	ISO
GO:MF	oxidoreductase activity, acting on paired donors, with incorporation or reduction of molecular oxygen, reduced flavin or flavoprotein as one donor, and incorporation of one atom of oxygen	GO:0016712	7.9403e-05	4.10016	80	162	6	55414																												IBA
GO:MF	iron ion binding	GO:0005506	0.000128391	3.89147	211	162	8	55414																												IEA								ISO
GO:MF	DNA-binding transcription activator activity, RNA polymerase II-specific	GO:0001228	0.000179188	3.74669	503	162	11	55414												IBA																									IBA	ISO	ISO
GO:MF	oxidoreductase activity, acting on paired donors, with incorporation or reduction of molecular oxygen	GO:0016705	0.000255191	3.59314	231	162	8	55414																												IDA,ISO,IBA,IEA								ISO
GO:MF	purine ribonucleotide binding	GO:0032555	0.000539631	3.2679	1920	162	20	55414									IDA,IEA									IEA	IEA							IEA			IEA												ISS,ISO,IBA,IEA
GO:MF	purine nucleotide binding	GO:0017076	0.000607844	3.21621	1935	162	20	55414									IDA,IEA									IEA	IEA							IEA			IEA												ISS,ISO,IBA,IEA
GO:MF	ribonucleotide binding	GO:0032553	0.000627318	3.20251	1939	162	20	55414									IDA,IEA									IEA	IEA							IEA			IEA												ISS,ISO,IBA,IEA
GO:MF	heme binding	GO:0020037	0.000676974	3.16943	182	162	7	55414																												ISO,IBA,IEA
GO:MF	tetrapyrrole binding	GO:0046906	0.000933655	3.02981	191	162	7	55414																												ISO,IBA,IEA
GO:MF	adenyl ribonucleotide binding	GO:0032559	0.00200575	2.69772	1557	162	17	55414																		IEA	IEA							IEA			IEA												ISS,ISO,IBA,IEA
GO:MF	adenyl nucleotide binding	GO:0030554	0.00225674	2.64652	1571	162	17	55414																		IEA	IEA							IEA			IEA												ISS,ISO,IBA,IEA
GO:MF	transition metal ion binding	GO:0046914	0.0023067	2.63701	1083	162	14	55414						ISS,ISO																						IEA								ISO
GO:MF	arachidonic acid 14,15-epoxygenase activity	GO:0008404	0.00381389	2.41863	13	162	3	55414																												IDA
GO:MF	purine ribonucleoside triphosphate binding	GO:0035639	0.00460499	2.33677	1840	162	18	55414																		IEA	IEA							IEA			IEA												ISS,ISO,IBA,IEA
GO:MF	ATP binding	GO:0005524	0.00471971	2.32608	1487	162	16	55414																		IEA	IEA							IEA			IEA												ISS,ISO,IBA,IEA
GO:BP	histone H2A-K119 monoubiquitination	GO:0036353	4.81678e-08	7.31724	9	2488:91500000	5	55414			IMP,IBA	IMP,IBA	ISS,ISO,IBA,IEA	ISS,IBA	ISS,ISO,IBA,IEA
GO:BP	epoxygenase P450 pathway	GO:0019373	1.37447e-06	5.86186	34	2324:72500000	6	55414																												IBA
GO:BP	histone H2A monoubiquitination	GO:0035518	3.20649e-06	5.49397	18	162	5	55414			IMP,IBA	IMP,IBA	ISS,ISO,IBA,IEA	ISS,IBA	ISS,ISO,IBA,IEA
GO:BP	xenobiotic metabolic process	GO:0006805	6.25664e-06	5.20366	122	162	8	55414																								IBA				IBA
GO:BP	cellular response to xenobiotic stimulus	GO:0071466	6.64774e-06	5.17733	179	162	9	55414																								IBA				IBA
GO:BP	lipid metabolic process	GO:0006629	8.34618e-06	5.07851	1371	162	20	55414																			ISS,ISO,IEA									IBA,IEA	ISS,ISO,IEA				ISS,ISO,IBA,IEA			ISS,ISO,IEA
GO:BP	histone H2A ubiquitination	GO:0033522	3.59218e-05	4.44464	28	162	5	55414			IMP,IBA	IMP,IBA	ISS,ISO,IBA,IEA	ISS,IBA	ISS,ISO,IBA,IEA
GO:BP	histone monoubiquitination	GO:0010390	5.18412e-05	4.28533	30	162	5	55414			IMP,IBA	IMP,IBA	ISS,ISO,IBA,IEA	ISS,IBA	ISS,ISO,IBA,IEA
GO:BP	chromosome organization	GO:0051276	7.15874e-05	4.14516	981	162	16	55414			IMP	IMP,IBA		ISS,IEA																			ISS,ISO,IEA
GO:BP	response to xenobiotic stimulus	GO:0009410	7.29914e-05	4.13673	316	162	10	55414																								IBA				IBA
GO:BP	xenobiotic catabolic process	GO:0042178	0.000103051	3.98695	68	162	6	55414																												IBA
GO:BP	olefinic compound metabolic process	GO:0120254	0.000115447	3.93762	177	162	8	55414																			ISS,ISO,IEA									IBA,IEA
GO:BP	cellular lipid metabolic process	GO:0044255	0.000126687	3.89727	1023	162	16	55414																			ISS,ISO,IEA									IBA,IEA					ISS,ISO,IBA,IEA
GO:BP	positive regulation of RNA metabolic process	GO:0051254	0.000134035	3.87278	1786	162	21	55414				ISO,IEA								IEA																									IEA	ISO	ISO
GO:BP	positive regulation of nucleobase-containing compound metabolic process	GO:0045935	0.000138588	3.85828	1957	162	22	55414				ISO,IEA								IEA																									IEA	ISO	ISO
GO:BP	arachidonic acid metabolic process	GO:0019369	0.000218435	3.66068	77	162	6	55414																												IBA,IEA
GO:BP	positive regulation of transcription by RNA polymerase II	GO:0045944	0.000395745	3.40258	1261	162	17	55414				ISO,IEA								IEA																									IEA	ISO	ISO
GO:BP	histone ubiquitination	GO:0016574	0.000597001	3.22402	48	162	5	55414			IMP,IBA	IMP,IBA	ISS,ISO,IBA,IEA	IDA,ISS,IBA	ISS,ISO,IBA,IEA
GO:BP	positive regulation of transcription, DNA-templated	GO:0045893	0.000840321	3.07556	1654	162	19	55414				ISO,IEA								IEA																									IEA	ISO	ISO
GO:BP	positive regulation of nucleic acid-templated transcription	GO:1903508	0.000840321	3.07556	1654	162	19	55414				ISO,IEA								IEA																									IEA	ISO	ISO
GO:BP	positive regulation of RNA biosynthetic process	GO:1902680	0.000855668	3.06769	1656	162	19	55414				ISO,IEA								IEA																									IEA	ISO	ISO
GO:BP	dosage compensation by inactivation of X chromosome	GO:0009048	0.00137395	2.86203	24	162	4	55414			IMP	IMP,IBA																					ISS,ISO,IEA
GO:BP	chromatin organization	GO:0006325	0.00143566	2.84295	548	162	11	55414			IMP	IMP,IBA		ISS,IEA																			ISS,ISO,IEA
GO:BP	positive regulation of macromolecule biosynthetic process	GO:0010557	0.00150298	2.82305	1893	162	20	55414				ISO,IEA								IEA																									IEA	ISO	ISO
GO:BP	dosage compensation	GO:0007549	0.00192426	2.71574	26	162	4	55414			IMP	IMP,IBA																					ISS,ISO,IEA
GO:BP	regulation of gene expression, epigenetic	GO:0040029	0.00367381	2.43488	124	162	6	55414			IMP	IMP,IBA		ISS																			ISS,ISO,IEA
GO:BP	long-chain fatty acid metabolic process	GO:0001676	0.00403255	2.39442	126	162	6	55414																												IBA,IEA
GO:BP	protein monoubiquitination	GO:0006513	0.00460989	2.33631	72	162	5	55414			IMP,IBA	IMP,IBA	ISS,ISO,IBA,IEA	ISS,IBA	ISS,ISO,IBA,IEA
GO:BP	monocarboxylic acid metabolic process	GO:0032787	0.00657461	2.18213	642	162	11	55414																												IBA,IEA
GO:BP	icosanoid metabolic process	GO:0006690	0.00945945	2.02413	146	162	6	55414																												IBA,IEA
GO:BP	unsaturated fatty acid metabolic process	GO:0033559	0.00945945	2.02413	146	162	6	55414																												IBA,IEA
GO:CC	nuclear outer membrane-endoplasmic reticulum membrane network	GO:0042175	7.27523e-08	7.13815	1037	162	19	55414																												IEA					IBA,IEA
GO:CC	PRC1 complex	GO:0035102	1.59933e-07	6.79606	15	162	5	55414			IBA	IBA	ISS,ISO,IBA,IEA	ISO,IBA	IBA
GO:CC	PcG protein complex	GO:0031519	1.71327e-06	5.76617	48	162	6	55414			IDA,ISS,ISO,IBA,IEA	IDA,ISS,ISO,IBA,IEA	IDA,ISS,ISO,IBA,IEA	IDA,ISO,IBA,IEA	IDA,ISS,ISO,IBA,IEA
GO:CC	endoplasmic reticulum membrane	GO:0005789	2.40953e-06	5.61807	1012	162	17	55414																												IEA					IBA,IEA
GO:CC	endoplasmic reticulum subcompartment	GO:0098827	2.66467e-06	5.57436	1019	162	17	55414																												IEA					IBA,IEA
GO:CC	organelle subcompartment	GO:0031984	1.8708e-05	4.72797	1313	162	18	55414																												IEA					IBA,IEA
GO:CC	endoplasmic reticulum	GO:0005783	2.47656e-05	4.60615	1815	162	21	55414																			ISS,ISO,IEA									IEA					IBA,IEA
GO:CC	nuclear ubiquitin ligase complex	GO:0000152	5.40108e-05	4.26752	44	162	5	55414			IBA	IBA	ISS,ISO,IBA,IEA	ISO,IBA	IBA
GO:CC	non-motile cilium	GO:0097730	0.00015811	3.80104	163	162	7	55414								IDA,IBA											IDA,ISS
GO:CC	photoreceptor cell cilium	GO:0097733	0.000334266	3.47591	115	162	6	55414								IDA,IBA											IDA,ISS
GO:CC	IPAF inflammasome complex	GO:0072557	0.000369223	3.43271	8	162	3	55414																																									IBA
GO:CC	9+0 non-motile cilium	GO:0097731	0.000596635	3.22429	127	162	6	55414								IDA,IBA											IDA,ISS
GO:CC	envelope	GO:0031975	0.000657997	3.18178	1186	162	15	55414																																		ISO,IEA		ISO
GO:CC	organelle envelope	GO:0031967	0.000657997	3.18178	1186	162	15	55414																																		ISO,IEA		ISO
GO:CC	X chromosome	GO:0000805	0.000787793	3.10359	10	162	3	55414			IDA	IDA																					IDA,ISO,IEA
GO:CC	organelle inner membrane	GO:0019866	0.00621282	2.20671	514	162	9	55414																																				ISO
GO:CC	inflammasome complex	GO:0061702	0.00623945	2.20485	19	162	3	55414																																									IBA
GO:CC	catalytic complex	GO:1902494	0.00784875	2.1052	1464	162	15	55414			IBA	IBA	ISS,ISO,IBA,IEA	IDA,ISS,ISO,IBA	IBA
KEGG	Chemical carcinogenesis - DNA adducts	KEGG:05204	1.03716e-08	7.98415	84	162	8	55414																								KEGG				KEGG
KEGG	Metabolic pathways	KEGG:01100	1.0526e-07	6.97774	1582	162	22	55414								KEGG	KEGG															KEGG				KEGG					KEGG
KEGG	Steroid hormone biosynthesis	KEGG:00140	6.76216e-07	6.16991	91	162	7	55414																												KEGG
KEGG	Herpes simplex virus 1 infection	KEGG:05168	5.22158e-06	5.2822	438	162	11	55414											KEGG	KEGG									KEGG																KEGG		KEGG	KEGG
KEGG	Metabolism of xenobiotics by cytochrome P450	KEGG:00980	5.27842e-06	5.2775	73	162	6	55414																								KEGG
KEGG	Retinol metabolism	KEGG:00830	2.71958e-05	4.5655	96	162	6	55414																												KEGG
KEGG	Drug metabolism - cytochrome P450	KEGG:00982	0.000143329	3.84366	71	162	5	55414																								KEGG
KEGG	Drug metabolism - other enzymes	KEGG:00983	0.00051525	3.28798	92	162	5	55414																								KEGG
KEGG	Linoleic acid metabolism	KEGG:00591	0.000935525	3.02894	50	162	4	55414																												KEGG
KEGG	ABC transporters	KEGG:02010	0.000935525	3.02894	50	162	4	55414																		KEGG	KEGG							KEGG			KEGG
KEGG	Signaling pathways regulating pluripotency of stem cells	KEGG:04550	0.00390274	2.40863	140	162	5	55414			KEGG	KEGG	KEGG	KEGG	KEGG
KEGG	Ascorbate and aldarate metabolism	KEGG:00053	0.00665394	2.17692	31	162	3	55414
KEGG	Arachidonic acid metabolism	KEGG:00590	0.00759636	2.11939	85	162	4	55414																												KEGG
KEGG	Pentose and glucuronate interconversions	KEGG:00040	0.00960573	2.01747	35	162	3	55414
REAC	Gene expression (Transcription)	REAC:R-MMU-74160	2.6035e-06	5.58444	1017	162	17	55414				REAC	REAC	REAC						REAC																		REAC							REAC
REAC	Biological oxidations	REAC:R-MMU-211859	3.79609e-06	5.42066	210	162	9	55414																												REAC								REAC
REAC	RNA Polymerase II Transcription	REAC:R-MMU-73857	4.08182e-06	5.38915	918	162	16	55414				REAC	REAC	REAC						REAC																		REAC							REAC
REAC	Xenobiotics	REAC:R-MMU-211981	1.65817e-05	4.78037	35	162	5	55414																												REAC
REAC	Cytochrome P450 - arranged by substrate type	REAC:R-MMU-211897	3.35397e-05	4.47444	78	162	6	55414																												REAC								REAC
REAC	Generic Transcription Pathway	REAC:R-MMU-212436	0.000221236	3.65515	803	162	13	55414				REAC	REAC	REAC						REAC																									REAC
REAC	Phase I - Functionalization of compounds	REAC:R-MMU-211945	0.000319325	3.49577	114	162	6	55414																												REAC								REAC
REAC	Glucuronidation	REAC:R-MMU-156588	0.00990624	2.00409	22	162	3	55414
WP	Eicosanoid metabolism via cytochrome P450 monooxygenases	WP:WP4349	0.000473599	3.32459	16	162	3	55414																												WP
WP	Metapathway biotransformation	WP:WP1251	0.00223309	2.65109	141	162	5	55414																								WP
TF	Factor: BBX; motif: NNWNNGTTAACANNNNN; match class: 1	TF:M02843_1	2.02881e-08	7.69276	1645	162	25	55414				TF														TF						TF								TF					TF		TF
TF	Factor: SFPI1; motif: NNAWTTNNGGAACN; match class: 1	TF:M02896_1	5.37857e-08	7.26933	1306	162	22	55414												TF				TF															TF							TF		TF	TF
TF	Factor: FOXK1; motif: NNNAYAAYAACANNN; match class: 1	TF:M02856_1	1.91306e-07	6.71827	1537	162	23	55414														TF	TF													TF						TF
TF	Factor: NFATc4; motif: WNNTTTTCCT	TF:M01734	6.0195e-07	6.22044	1345	162	21	55414						TF																									TF				TF
TF	Factor: beta-catenin; motif: CTTTGWTN; match class: 1	TF:M07376_1	1.58521e-06	5.79991	1280	162	20	55414										TF																								TF				TF		TF
TF	Factor: CREB; motif: CNNTGACGTMA; match class: 1	TF:M00917_1	4.9332e-06	5.30687	1667	162	22	55414																									TF
TF	Factor: RBP-Jkappa; motif: TTCCCACK	TF:M01111	5.05529e-06	5.29625	1094	162	18	55414																									TF
TF	Factor: Sox-3; motif: NCCTTTGTNYN	TF:M09709	5.37757e-06	5.26941	1675	162	22	55414													TF	TF	TF				TF	TF										TF		TF		TF
TF	Factor: DMRT1; motif: TTGMTACAWTGTTKC	TF:M01146	6.99977e-06	5.15492	1255	162	19	55414					TF								TF	TF	TF		TF																			TF	TF
TF	Factor: CREB; motif: NSTGACGTMANN; match class: 1	TF:M00178_1	8.22979e-06	5.08461	1561	162	21	55414
TF	Factor: Gfi1b; motif: YYCAATCWSD	TF:M03825	1.2384e-05	4.90714	1916	162	23	55414						TF	TF									TF												TF		TF						TF		TF		TF
TF	Factor: ER-beta; motif: ANNSTGACCYRGNN; match class: 1	TF:M03821_1	1.53151e-05	4.81488	1776	162	22	55414											TF	TF				TF																TF					TF	TF	TF	TF
TF	Factor: STAT5A; motif: NAWTTCYNGGAANYN; match class: 1	TF:M00457_1	1.75956e-05	4.7546	1953	162	23	55414		TF			TF								TF	TF	TF	TF		TF	TF			TF		TF
TF	Factor: ATF-1; motif: NNNTGACGTNNN; match class: 1	TF:M07034_1	4.70502e-05	4.32744	1267	162	18	55414																									TF
TF	Factor: CREB1; motif: NNNNACGTCANN; match class: 1	TF:M03544_1	5.60972e-05	4.25106	1282	162	18	55414																									TF
TF	Factor: IRF-5; motif: NNNANCGAGARTNNN	TF:M02873	6.7779e-05	4.1689	1767	162	21	55414																										TF												TF		TF
TF	Factor: CREB1; motif: NNNNTGACGTNANNN; match class: 1	TF:M07248_1	7.82617e-05	4.10645	1311	162	18	55414																									TF
TF	Factor: NFATc3; motif: WGGAAAANN	TF:M07607	8.97814e-05	4.04681	1797	162	21	55414																		TF	TF							TF					TF				TF		TF
TF	Factor: ATF2; motif: VGTGACGTMACN; match class: 1	TF:M00179_1	9.57856e-05	4.0187	1804	162	21	55414																									TF
TF	Factor: SOX; motif: CTCTTTGTTANGA; match class: 1	TF:M01014_1	9.90758e-05	4.00403	1644	162	20	55414																				TF			TF								TF			TF					TF
TF	Factor: IRF-8; motif: NNAARRGGAASTGAAASTNN	TF:M10271	9.92826e-05	4.00313	779	162	14	55414													TF																									TF		TF
TF	Factor: Sox-7; motif: GTNNNAATTGTNTGNGNNNKNN; match class: 1	TF:M02911_1	0.000101615	3.99304	1979	162	22	55414			TF													TF						TF			TF
TF	Factor: Beta-catenin; motif: GNNNNCTTTGWTGNY; match class: 1	TF:M07035_1	0.000153318	3.81441	1077	162	16	55414										TF																								TF				TF		TF
TF	Factor: TFF-1; motif: NNANCCACTTGAMNTT; match class: 1	TF:M01312_1	0.000163199	3.78728	1227	162	17	55414				TF													TF																	TF
TF	Factor: ATF-1; motif: TNACGTCAN; match class: 1	TF:M01861_1	0.000229473	3.63927	1902	162	21	55414																									TF
TF	Factor: CREB; motif: TGACGTMA; match class: 1	TF:M00039_1	0.00027512	3.56048	1588	162	19	55414																									TF
TF	Factor: Sall1; motif: NMTTTTGRAYN	TF:M06851	0.000303187	3.51829	1764	162	20	55414																																					TF
TF	Factor: CREB; motif: NNTKACGTCANNNS; match class: 1	TF:M00916_1	0.000325521	3.48742	1772	162	20	55414																									TF
TF	Factor: ATF-4; motif: KACGTCAKS; match class: 1	TF:M01864_1	0.000336422	3.47312	1448	162	18	55414																																	TF
TF	Factor: aMEF-2; motif: CKGDYTAAAAATAACYMM	TF:M00403	0.000419744	3.37702	1801	162	20	55414											TF					TF		TF																	TF				TF		TF
TF	Factor: ALX1; motif: NTAATYYAATTAN	TF:M04296	0.000708482	3.14967	1364	162	17	55414				TF																								TF				TF			TF						TF
TF	Factor: STAT3; motif: NNTCAYTTCCYGKNA; match class: 1	TF:M09714_1	0.000775164	3.11061	1373	162	17	55414				TF									TF					TF
TF	Factor: HNF-1alpha; motif: NNKNNGTTAACTAANNN; match class: 1	TF:M01379_1	0.000798626	3.09766	1376	162	17	55414																		TF
TF	Factor: BCL-6; motif: WRCTTTCKAGGRAT; match class: 1	TF:M01185_1	0.000966387	3.01485	1727	162	19	55414				TF		TF							TF	TF	TF	TF																			TF						TF
TF	Factor: CREB1; motif: NRRTGACGTMA; match class: 1	TF:M10200_1	0.00105079	2.97848	1404	162	17	55414																									TF
TF	Factor: HOXB8; motif: NNNNGYAATTAATANW	TF:M01451	0.0011074	2.9557	1743	162	19	55414				TF		TF															TF	TF		TF								TF	TF								TF
TF	Factor: ATF-2; motif: NNNTGACGTNAN; match class: 1	TF:M01862_1	0.00115966	2.93567	1103	162	15	55414																																						TF		TF
TF	Factor: NeuroD; motif: NRRCAGATGGY	TF:M09701	0.00117365	2.93046	1580	162	18	55414											TF													TF					TF										TF
TF	Factor: ER-beta; motif: GTCANASTGRCCYNR; match class: 1	TF:M01875_1	0.00118472	2.92638	1751	162	19	55414											TF																									TF			TF
TF	Factor: Six-3; motif: NWBTAATNYYWN; match class: 1	TF:M07428_1	0.00118716	2.92549	820	162	13	55414				TF																												TF
TF	Factor: ATF-2; motif: NNTGACGTCAN; match class: 1	TF:M07312_1	0.00123924	2.90684	1262	162	16	55414
TF	Factor: Staf; motif: NTTWCCCANMATGCAYYRCGNY	TF:M00262	0.00138952	2.85713	1599	162	18	55414																		TF				TF			TF					TF
TF	Factor: SNAP190; motif: TRCCRATT; match class: 1	TF:M05550_1	0.00154723	2.81045	1960	162	20	55414											TF			TF	TF							TF	TF		TF					TF
TF	Factor: HNF-4; motif: NNNNNNNGNNCAAAGKYCAN	TF:M03828	0.00183589	2.73615	1631	162	18	55414										TF	TF			TF	TF	TF	TF	TF																			TF
TF	Factor: ZBP89; motif: YCCYCCCCCM	TF:M01816	0.00208587	2.68071	1999	162	20	55414			TF	TF	TF																					TF
TF	Factor: Tcfap2c; motif: WNNSCCYSRGGSNAN	TF:M02821	0.00240869	2.61822	1663	162	18	55414										TF
TF	Factor: Clock; motif: CNGNCACGTGNNNM	TF:M10197	0.00242895	2.61458	1664	162	18	55414																				TF		TF									TF
TF	Factor: CREB; motif: CGTCAN; match class: 1	TF:M00801_1	0.00255987	2.59178	613	162	11	55414																									TF
TF	Factor: Pbx; motif: NKTGATTGACRKSN; match class: 1	TF:M01967_1	0.00296279	2.5283	1191	162	15	55414		TF								TF						TF														TF								TF		TF
TF	Factor: CREB; motif: NSTGACGTAANN; match class: 1	TF:M00177_1	0.00302547	2.51921	1353	162	16	55414																									TF
TF	Factor: Foxj3; motif: RTAAACAA	TF:M04275	0.00419807	2.37695	1557	162	17	55414			TF														TF																		TF						TF
TF	Factor: Foxj2; motif: RTAAACAA	TF:M07990	0.00419807	2.37695	1557	162	17	55414			TF														TF																		TF						TF
TF	Factor: hbp1; motif: BTCAATSAR	TF:M01661	0.00421642	2.37506	646	162	11	55414												TF
TF	Factor: FKHL5; motif: NNRTAAACANN	TF:M12425	0.00425042	2.37157	1912	162	19	55414											TF						TF		TF					TF									TF		TF			TF	TF	TF
TF	Factor: HNF-4alpha; motif: NRGKNCAAAGTCCA	TF:M10260	0.00449374	2.34739	1396	162	16	55414				TF													TF											TF							TF
TF	Factor: Elk-1; motif: AACCGGAAGTR; match class: 1	TF:M01163_1	0.00449858	2.34692	1233	162	15	55414								TF
TF	Factor: C/EBP; motif: NNNTKNNGNAAN; match class: 1	TF:M00770_1	0.00481445	2.31745	1240	162	15	55414																							TF									TF		TF					TF
TF	Factor: EOMES; motif: NNNNAGGTGTYGNNNN	TF:M02851	0.00500767	2.30036	1578	162	17	55414																TF			TF					TF							TF
TF	Factor: RBPJK; motif: NNSTGGGAANN	TF:M10387	0.00530724	2.27513	1585	162	17	55414									TF											TF			TF															TF		TF
TF	Factor: STAT4; motif: YTTCCYRGAAR	TF:M09715	0.00619659	2.20785	1781	162	18	55414													TF	TF	TF	TF		TF					TF
TF	Factor: MASH-1; motif: YMMCACCTGCY	TF:M03877	0.00687918	2.16246	964	162	13	55414																										TF													TF
TF	Factor: Nrf2; motif: ACNRTGACTCAGCANWA	TF:M03835	0.00748984	2.12553	1806	162	18	55414		TF				TF							TF																	TF							TF				TF
TF	Factor: Sox-12; motif: NNNNASACAAAGRANT; match class: 1	TF:M02900_1	0.00771862	2.11246	1994	162	19	55414																												TF				TF		TF		TF		TF		TF
TF	Factor: CREM; motif: TGACGTCASYN; match class: 1	TF:M01820_1	0.00777595	2.10925	1811	162	18	55414
TF	Factor: FKHL14; motif: TMNAAACARKAASA; match class: 1	TF:M08882_1	0.00864586	2.06319	837	162	12	55414					TF																							TF			TF
TF	Factor: Hoxa11; motif: NGTCGTAAAANN	TF:M04366	0.00924862	2.03392	1310	162	15	55414																																						TF		TF
TF	Factor: DEC2; motif: SNTCACGTGS; match class: 1	TF:M01843_1	0.00994174	2.00254	998	162	13	55414																															TF							TF		TF
TF	Factor: VBP; motif: GTTACRTMAT; match class: 1	TF:M00228_1	0.00998383	2.0007	576	162	10	55414														TF	TF
[truncated: 121 more columns]

## Sheet: Table S3 GO Orkney
Table S3. Significant GO term enrichments of the candidate genes experienced hard sweep in Orkney voles. The threshold of p value was 0.05.
source	term_name	term_id	adjusted_p_value	negative_log10_of_adjusted_p_value	term_size	query_size	intersection_size	effective_domain_size	ENSMUSG00000060586	ENSMUSG00000067341	ENSMUSG00000024340	ENSMUSG00000036322	ENSMUSG00000036594	ENSMUSG00000028268	ENSMUSG00000040253	ENSMUSG00000079363	ENSMUSG00000040264	ENSMUSG00000028270	ENSMUSG00000069793	ENSMUSG00000035208	ENSMUSG00000030798	ENSMUSG00000039691	ENSMUSG00000046733	ENSMUSG00000001173	ENSMUSG00000030204	ENSMUSG00000027403	ENSMUSG00000069668	ENSMUSG00000073682	ENSMUSG00000084897	ENSMUSG00000090353	ENSMUSG00000074892	ENSMUSG00000040666	ENSMUSG00000030287	ENSMUSG00000005481	ENSMUSG00000042419	ENSMUSG00000024402	ENSMUSG00000001674	ENSMUSG00000022884	ENSMUSG00000026463	ENSMUSG00000020633	ENSMUSG00000059280	ENSMUSG00000022783	ENSMUSG00000029408	ENSMUSG00000024339	ENSMUSG00000042476	ENSMUSG00000062638	ENSMUSG00000053216	ENSMUSG00000031642	ENSMUSG00000027500
GO:MF	purine ribonucleoside triphosphate binding	GO:0035639	3.27735e-09	8.48448	1840	46	15	55414						IBA,IEA	IBA,IEA	IBA,IEA	IEA	ISO,IBA,IEA	IEA	IEA					IEA									IEA			IEA	IEA	IEA				ISO,IEA	ISO,IEA	IEA
GO:MF	purine ribonucleotide binding	GO:0032555	5.9575e-09	8.22494	1920	46	15	55414						IBA,IEA	IBA,IEA	IBA,IEA	IEA	ISO,IBA,IEA	IEA	IEA					IEA									IEA			IEA	IEA	IEA				ISO,IEA	ISO,IEA	IEA
GO:MF	purine nucleotide binding	GO:0017076	6.64397e-09	8.17757	1935	46	15	55414						IBA,IEA	IBA,IEA	IBA,IEA	IEA	ISO,IBA,IEA	IEA	IEA					IEA									IEA			IEA	IEA	IEA				ISO,IEA	ISO,IEA	IEA
GO:MF	ribonucleotide binding	GO:0032553	6.83897e-09	8.16501	1939	46	15	55414						IBA,IEA	IBA,IEA	IBA,IEA	IEA	ISO,IBA,IEA	IEA	IEA					IEA									IEA			IEA	IEA	IEA				ISO,IEA	ISO,IEA	IEA
GO:MF	nucleoside-triphosphatase activity	GO:0017111	5.92131e-07	6.22758	627	46	9	55414						ISS,IBA,IEA	IBA,IEA	IBA,IEA	IEA	ISS,ISO,IBA,IEA							IEA									IEA			IEA	ISO,IEA
GO:MF	pyrophosphatase activity	GO:0016462	1.18059e-06	5.9279	679	46	9	55414						ISS,IBA,IEA	IBA,IEA	IBA,IEA	IEA	ISS,ISO,IBA,IEA							IEA									IEA			IEA	ISO,IEA
GO:MF	hydrolase activity, acting on acid anhydrides	GO:0016817	1.22643e-06	5.91136	682	46	9	55414						ISS,IBA,IEA	IBA,IEA	IBA,IEA	IEA	ISS,ISO,IBA,IEA							IEA									IEA			IEA	ISO,IEA
GO:MF	hydrolase activity, acting on acid anhydrides, in phosphorus-containing anhydrides	GO:0016818	1.22643e-06	5.91136	682	46	9	55414						ISS,IBA,IEA	IBA,IEA	IBA,IEA	IEA	ISS,ISO,IBA,IEA							IEA									IEA			IEA	ISO,IEA
GO:MF	ATP-dependent activity	GO:0140657	4.36952e-06	5.35957	547	46	8	55414																	IEA									IBA,IEA			IEA	ISO,IEA	ISO,IBA,IEA				ISS,ISO,IBA,IEA	ISO,IBA,IEA	ISS,ISO,IBA,IEA
GO:MF	peptide antigen binding	GO:0042605	4.01723e-05	4.39607	56	46	4	55414		ISO		IEA	IDA																															ISO
GO:MF	ATP binding	GO:0005524	8.63571e-05	4.0637	1487	46	10	55414											IEA	IEA					IEA									IEA			IEA	IEA	IEA				ISO,IEA	ISO,IEA	IEA
GO:MF	RNA helicase activity	GO:0003724	0.000105311	3.97753	71	46	4	55414																	IEA									IBA,IEA			IEA	IEA
GO:MF	ATP-dependent activity, acting on RNA	GO:0008186	0.000117826	3.92876	73	46	4	55414																	IEA									IBA,IEA			IEA	IEA
GO:MF	adenyl ribonucleotide binding	GO:0032559	0.00013134	3.8816	1557	46	10	55414											IEA	IEA					IEA									IEA			IEA	IEA	IEA				ISO,IEA	ISO,IEA	IEA
GO:MF	adenyl nucleotide binding	GO:0030554	0.000142472	3.84627	1571	46	10	55414											IEA	IEA					IEA									IEA			IEA	IEA	IEA				ISO,IEA	ISO,IEA	IEA
GO:MF	catalytic activity, acting on RNA	GO:0140098	0.00022106	3.65549	386	46	6	55414											ISO	IDA,ISO					IEA									IBA,IEA			IEA	IEA
GO:MF	ABC-type peptide transporter activity	GO:0015440	0.000549266	3.26022	3	46	2	55414																																			ISS,ISO,IBA,IEA	ISO,IBA,IEA
GO:MF	ABC-type peptide antigen transporter activity	GO:0015433	0.000549266	3.26022	3	46	2	55414																																			IBA	ISO,IBA
GO:MF	ATPase-coupled transmembrane transporter activity	GO:0042626	0.000781444	3.1071	117	46	4	55414																															ISO,IBA,IEA				ISS,ISO,IBA,IEA	ISO,IBA,IEA	ISS,ISO,IBA,IEA
GO:MF	GTPase activity	GO:0003924	0.00193824	2.71259	321	46	5	55414						ISS,IBA,IEA	IBA,IEA	IBA,IEA	IEA	ISS,ISO,IBA,IEA
GO:MF	signaling receptor binding	GO:0005102	0.00216503	2.66454	1667	46	9	55414		ISO	IDA,IBA	IEA																								TAS,IEA							IBA	ISO,IBA,IEA		IBA	IBA
GO:MF	helicase activity	GO:0004386	0.00220568	2.65646	152	46	4	55414																	IEA									IBA,IEA			IEA	IEA
GO:MF	primary active transmembrane transporter activity	GO:0015399	0.00232247	2.63405	154	46	4	55414																															ISO,IBA,IEA				ISS,ISO,IBA,IEA	ISO,IBA,IEA	ISS,ISO,IBA,IEA
GO:MF	catalytic activity, acting on a nucleic acid	GO:0140640	0.00235357	2.62827	583	46	6	55414											ISO	IDA,ISO					IEA									IBA,IEA			IEA	IEA
GO:MF	ABC-type transporter activity	GO:0140359	0.00330982	2.4802	53	46	3	55414																																			ISS,ISO,IBA,IEA	ISO,IBA,IEA	IEA
GO:MF	GTP binding	GO:0005525	0.00470675	2.32728	386	46	5	55414						IBA,IEA	IBA,IEA	IBA,IEA	IEA	ISO,IBA,IEA
GO:MF	guanyl ribonucleotide binding	GO:0032561	0.00620704	2.20712	409	46	5	55414						IBA,IEA	IBA,IEA	IBA,IEA	IEA	ISO,IBA,IEA
GO:MF	guanyl nucleotide binding	GO:0019001	0.00620704	2.20712	409	46	5	55414						IBA,IEA	IBA,IEA	IBA,IEA	IEA	ISO,IBA,IEA
GO:MF	antigen binding	GO:0003823	0.00674104	2.17127	202	46	4	55414		ISO		IEA	IDA																															ISO
GO:MF	MHC class II protein complex binding	GO:0023026	0.00820851	2.08574	10	46	2	55414		IBA			IBA
GO:BP	immune response	GO:0006955	5.0706e-11	10.2949	1794	46	17	55414	IEA	IEA	IMP,IBA	IEA	IDA,IEA	IDA,IBA	IDA,IBA	IDA,IBA		IDA,IBA			IMP														ISS,ISO,IBA,IEA	IMP,IGI,IEA					IBA			IDA,IMP,ISO,IEA		IBA	IDA,IBA
GO:BP	antigen processing and presentation of peptide antigen	GO:0048002	5.16963e-08	7.28654	71	46	6	55414	IEA	IBA,IEA		IEA	IDA,IBA																														IBA	IDA,IMP,ISO,IBA,IEA
GO:BP	antigen processing and presentation of exogenous peptide antigen	GO:0002478	7.12634e-08	7.14713	30	2657:17650000	5	55414	IEA	IBA,IEA		IEA	IDA,IBA																															IMP
GO:BP	defense response to protozoan	GO:0042832	1.18466e-07	6.92641	33	1113:13750000	5	55414						IDA,IBA	IDA,IMP,IBA	IBA		IDA,IBA			IGI
GO:BP	response to protozoan	GO:0001562	1.87827e-07	6.72624	36	46	5	55414						IDA,IBA	IDA,IMP,IBA	IBA		IDA,IBA			IGI
GO:BP	antigen processing and presentation of exogenous antigen	GO:0019884	2.17041e-07	6.66346	37	46	5	55414	IEA	IBA,IEA		IEA	IDA,IBA																															IMP
GO:BP	antigen processing and presentation	GO:0019882	9.88349e-07	6.00509	115	46	6	55414	IEA	IBA,IEA		IEA	IDA,IBA,IEA																														IBA	IDA,IMP,ISO,IBA,IEA
GO:BP	antigen processing and presentation of exogenous peptide antigen via MHC class II	GO:0019886	2.03284e-06	5.6919	18	46	4	55414	IEA	IBA,IEA		IEA	IDA,IBA
GO:BP	antigen processing and presentation of peptide antigen via MHC class II	GO:0002495	4.84777e-06	5.31446	22	46	4	55414	IEA	IBA,IEA		IEA	IDA,IBA
GO:BP	antigen processing and presentation of peptide or polysaccharide antigen via MHC class II	GO:0002504	7.03348e-06	5.15283	24	46	4	55414	IEA	IBA,IEA		IEA	IDA,IBA,IEA
GO:BP	response to other organism	GO:0051707	1.64912e-05	4.78275	1705	46	12	55414					IDA	IDA,IBA	IDA,IMP,IBA	IDA,IMP,IBA		IDA,IEP,IBA	IBA	IBA	IGI										IEP				ISS,ISO,IEA	IGI,IEA								IMP,ISO
GO:BP	response to external biotic stimulus	GO:0043207	1.69237e-05	4.7715	1709	46	12	55414					IDA	IDA,IBA	IDA,IMP,IBA	IDA,IMP,IBA		IDA,IEP,IBA	IBA	IBA	IGI										IEP				ISS,ISO,IEA	IGI,IEA								IMP,ISO
GO:BP	response to biotic stimulus	GO:0009607	2.17093e-05	4.66335	1748	46	12	55414					IDA	IDA,IBA	IDA,IMP,IBA	IDA,IMP,IBA		IDA,IEP,IBA	IBA	IBA	IGI										IEP				ISS,ISO,IEA	IGI,IEA								IMP,ISO
GO:BP	biological process involved in interspecies interaction between organisms	GO:0044419	4.07371e-05	4.39001	1851	46	12	55414					IDA	IDA,IBA	IDA,IMP,IBA	IDA,IMP,IBA		IDA,IEP,IBA	IBA	IBA	IGI										IEP				ISS,ISO,IEA	IGI,IEA								IMP,ISO
GO:BP	defense response to other organism	GO:0098542	5.24396e-05	4.28034	1162	46	10	55414					IDA	IDA,IBA	IDA,IMP,IBA	IDA,IMP,IBA		IDA,IBA	IBA	IBA	IGI															IGI								ISO
GO:BP	MHC class II protein complex assembly	GO:0002399	7.22701e-05	4.14104	9	46	3	55414		IBA		IEA	IBA
GO:BP	peptide antigen assembly with MHC class II protein complex	GO:0002503	7.22701e-05	4.14104	9	46	3	55414		IBA		IEA	IBA
GO:BP	defense response to Gram-positive bacterium	GO:0050830	0.000115108	3.93889	126	46	5	55414						IDA,IBA	IDA,IBA	IBA		IDA,IBA																		IGI
GO:BP	peptide antigen assembly with MHC protein complex	GO:0002501	0.000141794	3.84834	11	46	3	55414		IBA		IEA	IBA
GO:BP	positive regulation of immune system process	GO:0002684	0.000158545	3.79985	978	46	9	55414		IBA	IMP,IBA	IEA	IDA,IBA								IMP															IGI								IDA,IMP,ISO		IBA	IDA,IBA
GO:BP	MHC protein complex assembly	GO:0002396	0.000188949	3.72366	12	46	3	55414		IBA		IEA	IBA
GO:BP	leukocyte activation	GO:0045321	0.000253448	3.59611	1034	46	9	55414		IBA	IMP	IEA	IDA,ISO,IBA								IGI																				IGI					IMP,IGI	IDA
GO:BP	response to interferon-gamma	GO:0034341	0.00027474	3.56108	150	46	5	55414					IDA	IDA,IBA	IDA,IBA	IDA,IBA		IDA,IBA
GO:BP	T cell activation	GO:0042110	0.000377297	3.42332	518	46	7	55414		IBA	IMP	IEA	IDA,ISO,IBA																																	IMP,IGI	IDA
GO:BP	regulation of immune system process	GO:0002682	0.000500108	3.30094	1483	46	10	55414		IBA	IMP,IBA	IEA	IDA,ISO,IBA								IMP,IGI														ISS,ISO,IBA,IEA	IGI								IDA,IMP,ISO		IBA	IDA,IBA
GO:BP	adaptive immune response	GO:0002250	0.000537179	3.26988	546	46	7	55414	IEA	IEA		IEA	IEA																							IGI								IDA,IMP,ISO,IEA
GO:BP	adhesion of symbiont to host	GO:0044406	0.000582326	3.23483	17	46	3	55414						IDA	IDA			IDA
GO:BP	cell activation	GO:0001775	0.000599504	3.22221	1146	46	9	55414		IBA	IMP	IEA	IDA,ISO,IBA								IGI																				IGI					IMP,IGI	IDA
GO:BP	lymphocyte activation	GO:0046649	0.000828566	3.08167	862	46	8	55414		IBA	IMP	IEA	IDA,ISO,IBA																												IGI					IMP,IGI	IDA
GO:BP	regulation of immune response	GO:0050776	0.00125345	2.90189	911	46	8	55414			IMP,IBA	IEA									IMP														ISS,ISO,IBA,IEA	IGI								IDA,IMP,ISO		IBA	IDA,IBA
GO:BP	positive regulation of T cell activation	GO:0050870	0.00145182	2.83809	210	46	5	55414		IBA	IMP	IEA	IDA,IBA																																		IDA
GO:BP	defense response	GO:0006952	0.0018296	2.73764	1711	46	10	55414					IDA	IDA,IBA	IDA,IMP,IBA	IDA,IMP,IBA		IDA,IBA	IBA	IBA	IGI															IGI,TAS								ISO
GO:BP	positive regulation of leukocyte cell-cell adhesion	GO:1903039	0.00231825	2.63484	231	46	5	55414		IBA	IMP	IEA	IDA,IBA																																		IDA
GO:BP	response to bacterium	GO:0009617	0.00309975	2.50867	1029	46	8	55414						IDA,IBA	IDA,IBA	IBA		IDA,IEP,IBA													IEP				ISS,ISO,IEA	IGI,IEA								IMP
GO:BP	biological adhesion	GO:0022610	0.00357603	2.4466	1423	46	9	55414		IBA	IMP	IEA	IDA,ISO,IBA	IDA	IDA			IDA																								IMP					IDA
GO:BP	cellular response to interferon-gamma	GO:0071346	0.00547854	2.26133	122	46	4	55414						IDA,IBA	IDA,IBA	IDA,IBA		IDA,IBA
GO:BP	positive regulation of cell-cell adhesion	GO:0022409	0.00552969	2.2573	276	46	5	55414		IBA	IMP	IEA	IDA,IBA																																		IDA
GO:BP	T cell differentiation	GO:0030217	0.00603437	2.21937	281	46	5	55414				IEA	IDA																																	IMP,IGI	IDA
GO:BP	antigen processing and presentation of endogenous peptide antigen	GO:0002483	0.00713653	2.14651	38	46	3	55414				IEA																															IBA	IDA,ISO,IBA,IEA
GO:BP	antigen processing and presentation of endogenous antigen	GO:0019883	0.00772675	2.112	39	46	3	55414				IEA																															IBA	IDA,ISO,IBA,IEA
GO:CC	MHC class II protein complex	GO:0042613	3.3004e-08	7.48143	12	46	4	55414	IEA	ISO,IBA,IEA		IEA	IDA,IBA,IEA
GO:CC	MHC protein complex	GO:0042611	3.05113e-06	5.51554	34	46	4	55414	IEA	ISO,IBA,IEA		IEA	IDA,IBA,IEA
GO:CC	host intracellular part	GO:0033646	4.82081e-06	5.31688	8	46	3	55414						IDA	IDA			IDA
GO:CC	host cell cytoplasm part	GO:0033655	4.82081e-06	5.31688	8	46	3	55414						IDA	IDA			IDA
GO:CC	symbiont-containing vacuole	GO:0020003	4.82081e-06	5.31688	8	46	3	55414						IDA	IDA			IDA
GO:CC	host intracellular region	GO:0043656	4.82081e-06	5.31688	8	46	3	55414						IDA	IDA			IDA
GO:CC	symbiont-containing vacuole membrane	GO:0020005	4.82081e-06	5.31688	8	46	3	55414						IDA	IDA			IDA
GO:CC	host cell cytoplasm	GO:0030430	4.82081e-06	5.31688	8	46	3	55414						IDA	IDA			IDA
GO:CC	host cell part	GO:0033643	7.22701e-06	5.14104	9	46	3	55414						IDA	IDA			IDA
GO:CC	host cellular component	GO:0018995	4.79842e-05	4.3189	16	46	3	55414						IDA	IDA			IDA
GO:CC	host cell	GO:0043657	4.79842e-05	4.3189	16	46	3	55414						IDA	IDA			IDA
GO:CC	bounding membrane of organelle	GO:0098588	0.000137782	3.86081	1658	46	10	55414		ISO,IBA		IEA		IEA				IEA						IEA							IBA,IEA		ISO,IBA,IEA										ISS,ISO,IEA		ISO
GO:CC	Golgi apparatus	GO:0005794	0.000554936	3.25576	1502	46	9	55414						ISO,IEA				ISO,IEA						ISS,ISO,IEA							IBA,IEA														ISO			IEA	ISO,IEA
GO:CC	immunological synapse	GO:0001772	0.00111649	2.95215	44	46	3	55414		ISO		IEA									ISO,IEA
GO:CC	MHC class I peptide loading complex	GO:0042824	0.00389978	2.40896	9	46	2	55414																																			IBA	ISO,IBA,IEA
KEGG	Type I diabetes mellitus	KEGG:04940	1.101e-05	4.95821	61	46	4	55414	KEGG	KEGG			KEGG																							KEGG
KEGG	Antigen processing and presentation	KEGG:04612	3.46784e-05	4.45994	81	46	4	55414	KEGG	KEGG			KEGG																															KEGG
KEGG	NOD-like receptor signaling pathway	KEGG:04621	3.81459e-05	4.41855	201	46	5	55414						KEGG	KEGG		KEGG	KEGG															KEGG
KEGG	Asthma	KEGG:05310	5.62704e-05	4.24972	24	46	3	55414	KEGG	KEGG			KEGG
KEGG	Hematopoietic cell lineage	KEGG:04640	5.78534e-05	4.23767	92	46	4	55414	KEGG	KEGG			KEGG								KEGG
KEGG	Intestinal immune network for IgA production	KEGG:04672	0.000315837	3.50054	42	46	3	55414	KEGG	KEGG			KEGG
KEGG	ABC transporters	KEGG:02010	0.000536731	3.27024	50	46	3	55414																																			KEGG	KEGG	KEGG
KEGG	Graft-versus-host disease	KEGG:05332	0.000677661	3.16899	54	46	3	55414	KEGG	KEGG			KEGG
KEGG	Allograft rejection	KEGG:05330	0.000677661	3.16899	54	46	3	55414	KEGG	KEGG			KEGG
KEGG	Phagosome	KEGG:04145	0.000694515	3.15832	172	46	4	55414	KEGG	KEGG			KEGG																															KEGG
KEGG	Inflammatory bowel disease	KEGG:05321	0.000979276	3.0091	61	46	3	55414	KEGG	KEGG			KEGG
KEGG	Leishmaniasis	KEGG:05140	0.00141901	2.84801	69	46	3	55414	KEGG	KEGG			KEGG
KEGG	Autoimmune thyroid disease	KEGG:05320	0.00148168	2.82924	70	46	3	55414	KEGG	KEGG			KEGG
KEGG	Herpes simplex virus 1 infection	KEGG:05168	0.00166427	2.77878	438	46	5	55414	KEGG	KEGG			KEGG																							KEGG								KEGG
KEGG	Epstein-Barr virus infection	KEGG:05169	0.00175605	2.75546	218	46	4	55414	KEGG	KEGG			KEGG																															KEGG
KEGG	Viral myocarditis	KEGG:05416	0.00204965	2.68832	78	46	3	55414	KEGG	KEGG			KEGG
KEGG	Human T-cell leukemia virus 1 infection	KEGG:05166	0.00251099	2.60016	239	46	4	55414	KEGG	KEGG			KEGG																							KEGG
KEGG	Rheumatoid arthritis	KEGG:05323	0.00274447	2.56154	86	46	3	55414	KEGG	KEGG			KEGG
KEGG	Th1 and Th2 cell differentiation	KEGG:04658	0.00284084	2.54655	87	46	3	55414	KEGG	KEGG			KEGG
KEGG	Th17 cell differentiation	KEGG:04659	0.00483272	2.31581	104	46	3	55414	KEGG	KEGG			KEGG
KEGG	Toxoplasmosis	KEGG:05145	0.00555513	2.25531	109	46	3	55414	KEGG	KEGG			KEGG
KEGG	Staphylococcus aureus infection	KEGG:05150	0.00667968	2.17524	116	46	3	55414	KEGG	KEGG			KEGG
REAC	Butyrophilin (BTN) family interactions	REAC:R-MMU-8851680	0.0018686	2.72848	6	46	2	55414			REAC																																				REAC
WP	Nuclear receptors in lipid metabolism and toxicity	WP:WP431	0.00614747	2.2113	30	46	2	55414																																					WP
TF	Factor: ICSBP; motif: RAARTGAAACTG	TF:M00699	6.69972e-07	6.17394	1345	46	12	55414		TF	TF			TF	TF			TF	TF	TF				TF			TF			TF						TF
TF	Factor: ICSBP; motif: RAARTGAAACTG; match class: 1	TF:M00699_1	4.50068e-06	5.34672	74	46	5	55414						TF	TF			TF	TF											TF
TF	Factor: Tal-1; motif: CAGATGG; match class: 1	TF:M03804_1	9.37273e-05	4.02813	1313	46	10	55414					TF		TF									TF		TF								TF	TF							TF	TF	TF
TF	Factor: IRF-2; motif: NAAANNGAAAGTGAAASTRN	TF:M10268	0.000612109	3.21317	605	46	7	55414						TF	TF	TF	TF	TF						TF																				TF
TF	Factor: IRF; motif: RRAANTGAAASYGNV; match class: 1	TF:M00772_1	0.000741458	3.12991	85	46	4	55414						TF	TF		TF	TF
TF	Factor: IRF; motif: NNGAAANTGAAANN	TF:M08887	0.00356501	2.44794	1523	46	9	55414			TF			TF	TF		TF	TF	TF	TF										TF				TF
TF	Factor: VDR; motif: NRGGTCANNGRGKTCA	TF:M10410	0.00360308	2.44333	1525	46	9	55414	TF				TF									TF											TF				TF			TF		TF	TF
TF	Factor: IRF-1; motif: NRAANNGAAASTGAAASYNN; match class: 1	TF:M10267_1	0.00417259	2.37959	131	46	4	55414						TF			TF	TF						TF
TF	Factor: IRF-4; motif: NAAARRGGAASTGARANN; match class: 1	TF:M10270_1	0.00846768	2.07224	1696	46	9	55414		TF				TF	TF	TF	TF						TF		TF												TF											TF
TF	Factor: IRF-1; motif: NRAANNGAAASTGAAASYNN	TF:M10267	0.00903927	2.04387	1285	46	8	55414						TF	TF	TF	TF	TF						TF						TF														TF
HP	Joint swelling	HP:0001386	8.77675e-05	4.05667	50	46	4	55414		HP	HP													HP											HP
HP	Increased T cell count	HP:0100828	0.000635965	3.19657	2	46	2	55414		HP	HP
HP	Enlarged lacrimal glands	HP:0007734	0.000635965	3.19657	2	46	2	55414		HP	HP
HP	Enlargement of parotid gland	HP:0011801	0.00190689	2.71968	3	46	2	55414		HP	HP
HP	Elevated bronchoalveolar lavage fluid lymphocyte proportion	HP:0032976	0.00190689	2.71968	3	46	2	55414		HP	HP
HP	Parotitis	HP:0011850	0.00381175	2.41888	4	46	2	55414		HP	HP
[truncated: 5 more columns]
